# Supplementary material
Source: PubMed Central journal article supplement (PMC4290664)
Supplement: NIHMS50087-supplement-2.pdf [file NIHMS50087-supplement-2.pdf]

Supplements  
Figure 1

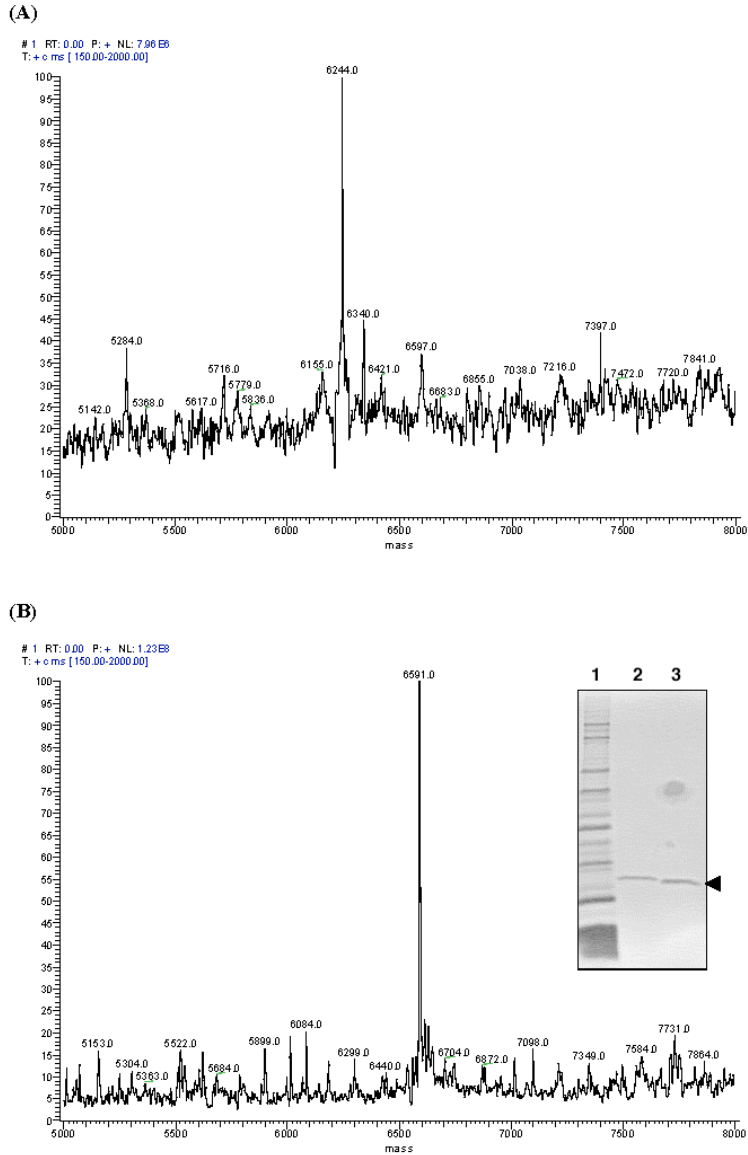

**Figure I.** MS analysis of native PAF (A) and DTT/iodoacetamide-treated PAF (B), respectively. Inset in (B): Coomassie-stained SDS-PAGE of DTT/iodoacetamide-treated (reduced) PAF. Lane 1: Marker (Mark 12™ MW Standard, Invitrogen), lane 2: reduced PAF (1 μg), lane 3: native PAF, control (1 μg). The arrow indicates MW 6 kDa.

Supplements

Figure II

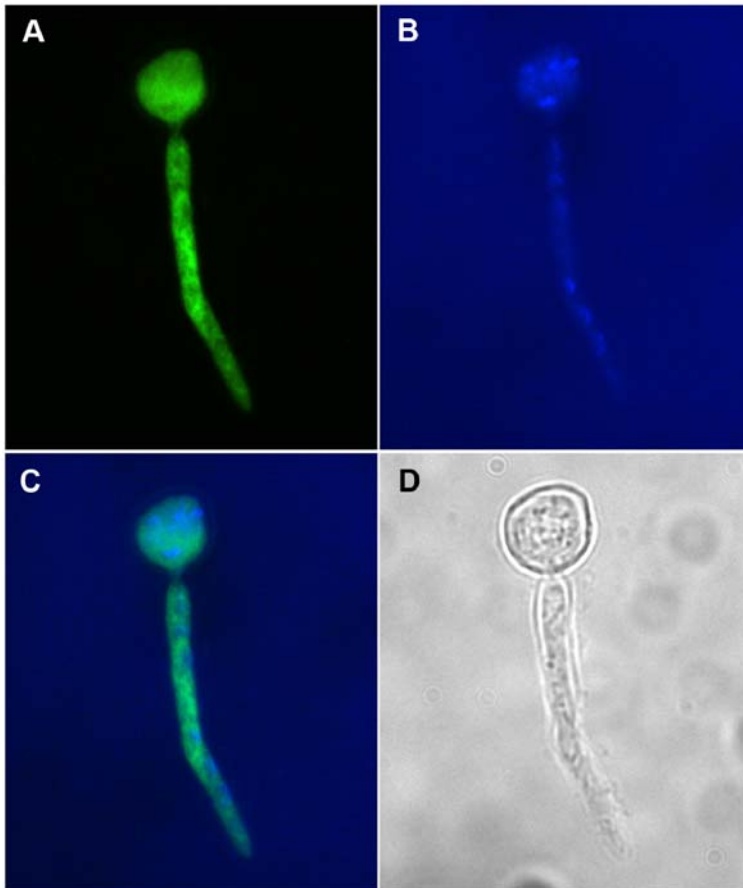

**Figure II.** Fluorescent micrographs of an *A. nidulans* germling. **(A)** The localization of PAF was determined by indirect immunofluorescence staining using a rabbit anti-PAF serum and a FITC-conjugated goat anti-rabbit IgG. **(B)** The nuclei were visualized by DAPI staining. **(C)** Merge picture of (A) and (B). **(D)** Phase contrast of images (A-C).



| 7 | 14 | 26 | 28 | 33 | 40 | 49 | 51 |
|---|----|----|----|----|----|----|----|
| a | b  | b  | c  | a  | d  | c  | d  |
| a | a  | b  | c  | c  | d  | b  | d  |
| a | b  | c  | d  | a  | b  | c  | d  |

  

| 7 | 14 | 28 | 36 | 43 | 54 |
|---|----|----|----|----|----|
| a | b  | b  | a  | c  | c  |
| a | b  | c  | a  | b  | c  |

**Figure IV.** Correspondence of the cysteines and disulfide bond assignments in AFP (top) and PAF (bottom). Patterns **abcabc** (7-36, 14-43, 28-54) and **abbacc** (7-36, 14-28, 43-54) in PAF have the related topologies in AFP as **abcdabcd** (7-33, 14-40, 26-49, 28-51) and **abccadcd** (7-33, 14-26, 28-49, 40-51).

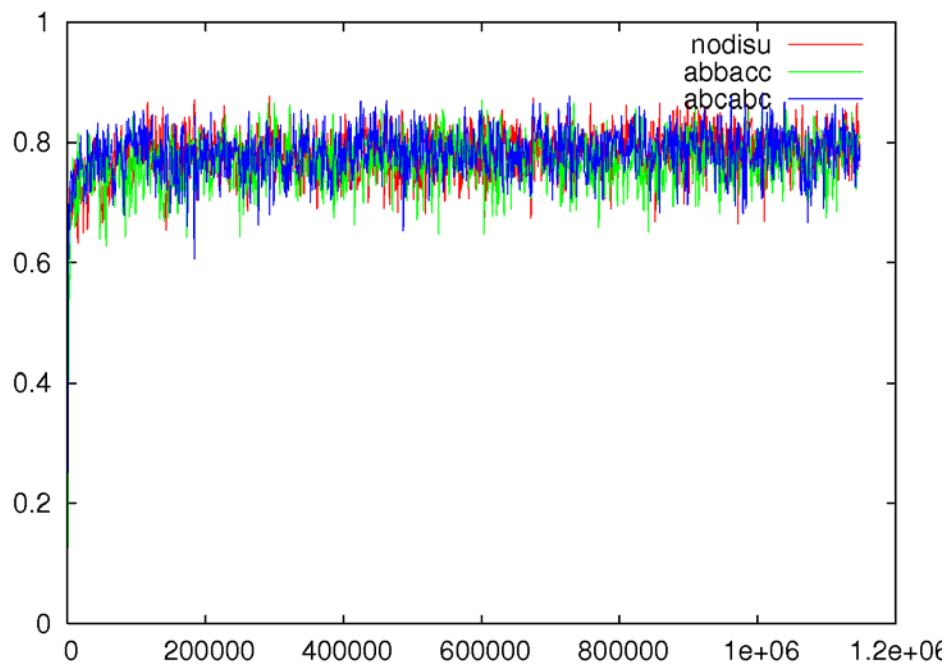

**Figure V.** Calculated  $S^2$  values in the course of the MUMO dynamics simulations for the different disulfide pairings. On the x-axis the progress of calculations is monitored by the number of MD steps. On average, the mean value agrees well with the  $S^2 = 0.81 \pm 0.05$  measured experimentally by  $^{15}\text{N}$  relaxation NMR.

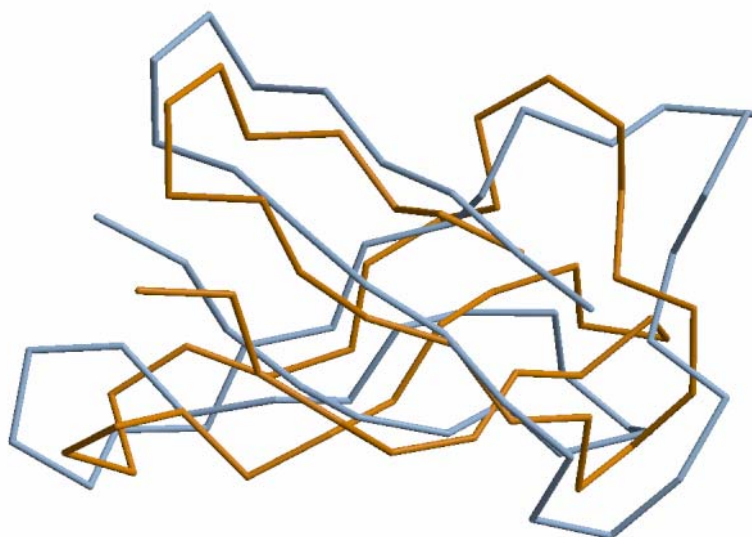

**Figure VI.** Overlaid mean structures of CA chains of PAF (blue) and AFP (yellow) with no disulfide bond constraints.

**Table I.** Selected NMR data of PAF as measured at 304K in H<sub>2</sub>O/D<sub>2</sub>O solution and described in the experimental part. T<sub>1</sub> and T<sub>2</sub> are the <sup>15</sup>N auto-relaxation times, NOEDs are the <sup>15</sup>N-<sup>1</sup>H} NOE difference values,  $\eta_{zzN}$ ,  $\eta_{xyN}$  and  $\eta_{xyH}$  are the longitudinal (zz) and transversal (xy) <sup>15</sup>N or <sup>1</sup>H CSA/DD cross-correlated relaxation rates, <sup>3</sup>J<sub>HN,HA</sub> stands for three-bond homonuclear spin-spin couplings determined from high-resolution HSQC spectra. S<sup>2</sup> order parameters were calculated from T<sub>1</sub>, T<sub>2</sub> and NOEDs using the model-free method of Lipari and Szabo, supposed a constant -160 ppm <sup>15</sup>N CSA value.

| Residue   | T <sub>1</sub> (s) | NOED    | T <sub>2</sub> (s) | $\eta_{zzN}$ (s <sup>-1</sup> ) | $\eta_{xyN}$ (s <sup>-1</sup> ) | $\eta_{xyH}$ (s <sup>-1</sup> ) | <sup>3</sup> J <sub>HNHA</sub> (Hz) | S <sup>2</sup> |
|-----------|--------------------|---------|--------------------|---------------------------------|---------------------------------|---------------------------------|-------------------------------------|----------------|
|           |                    |         |                    |                                 |                                 |                                 |                                     |                |
| <b>2</b>  | 0.4426             | -0.5123 | 0.2464             | 1.4377                          | 2.035                           | 1.09                            | 9.07                                | 0.70481        |
| <b>3</b>  | 0.3942             | -0.4254 | 0.2269             | 1.4145                          | 2.6738                          | 1.69                            | 10                                  | 0.78875        |
| <b>4</b>  | 0.3967             | -0.3925 | 0.2185             | 1.4484                          | 2.7427                          | 1.88                            | 9.95                                | 0.80836        |
| <b>5</b>  | 0.3782             | -0.3354 | 0.2186             | 1.389                           | 2.9566                          | 1.95                            | 8.75                                | 0.81927        |
| <b>6</b>  | 0.3625             | -0.3958 | 0.2149             | 1.6369                          | 3.1508                          | 1.5                             | 9.06                                | 0.84888        |
| <b>7</b>  | 0.3599             | -0.3953 | 0.2159             | 1.9151                          | 2.9765                          | 1.75                            | 9.84                                | 0.84961        |
| <b>8</b>  | 0.3641             | -0.3366 | 0.2182             | 1.6338                          | 3.1082                          | 1.43                            | 10.12                               | 0.8423         |
| <b>9</b>  | 0.364              | -0.4423 | 0.2084             | 1.8126                          | 2.8262                          | 1.31                            | 4.7                                 | 0.85386        |
| <b>10</b> | 0.3821             | -0.4489 | 0.2114             | 1.4128                          | 2.4134                          | 1.35                            | -                                   | 0.82871        |
| <b>11</b> | 0.4121             | -0.4721 | 0.2264             | 1.3385                          | 3.0202                          | 0.42                            | 7.21                                | 0.7683         |
| <b>12</b> | 0.3713             | -0.4026 | 0.1933             | 1.7049                          | 3.0208                          | 1.12                            | 7.71                                | 0.89169        |
| <b>13</b> | 0.3641             | -0.3948 | 0.2097             | 1.7044                          | 3.0075                          | 1.06                            | 10.2                                | 0.85831        |
| <b>14</b> | 0.3684             | -0.4036 | 0.217              | 1.7572                          | 2.9338                          | 1.87                            | 9.38                                | 0.83666        |
| <b>15</b> | 0.3576             | -0.3588 | 0.2121             | 1.7687                          | 3.1694                          | 1.54                            | 9.67                                | 0.86627        |
| <b>16</b> | 0.3535             | -0.4118 | 0.2147             | 1.8645                          | 2.9911                          | 1.25                            | 8.74                                | 0.85688        |

|           |        |         |        |        |        |      |            |         |
|-----------|--------|---------|--------|--------|--------|------|------------|---------|
| <b>17</b> | 0.3938 | -0.4044 | 0.232  | 1.4638 | 2.8614 | 1.43 | 8.68       | 0.78257 |
| <b>18</b> | 0.3816 | -0.4731 | 0.2341 | 1.7433 | 3.0109 | 1.32 | 7.8        | 0.78015 |
| <b>19</b> | 0.4011 | -0.4358 | 0.2326 | 1.3775 | 2.4198 | 0.85 | -          | 0.77052 |
| <b>20</b> | 0.4091 | -0.401  | 0.2404 | 1.6331 | 2.9479 | 0.9  | 8.42       | 0.75491 |
| <b>21</b> | 0.3841 | -0.4522 | 0.229  | 1.5451 | 2.7981 | 1.78 | 6.64, 6.82 | 0.79015 |
| <b>22</b> | 0.38   | -0.4691 | 0.229  | 1.8362 | 3.0296 | 1.2  | 8.77       | 0.79133 |
| <b>23</b> | 0.3847 | -0.4259 | 0.225  | 1.6506 | 2.9587 | 1.57 | 4.5        | 0.80109 |
| <b>24</b> | 0.3846 | -0.3959 | 0.2327 | 1.4488 | 2.4143 | 1.68 | 9.83       | 0.79165 |
| <b>25</b> | 0.3826 | -0.373  | 0.2278 | 1.5915 | 2.737  | 1.79 | 9.8        | 0.8059  |
| <b>26</b> | 0.3687 | -0.3595 | 0.2197 | 1.6848 | 2.8625 | 1.55 | 8.35       | 0.83802 |
| <b>27</b> | 0.3766 | -0.3322 | 0.2239 | 1.6877 | 2.6263 | 1.43 | -          | 0.81287 |
| <b>28</b> | 0.3747 | -0.4245 | 0.2137 | 1.5646 | 2.7289 | 1.49 | 7.3        | 0.83401 |
| <b>29</b> |        |         |        |        |        |      |            |         |
| <b>30</b> | 0.4008 | -0.4336 | 0.2191 | 1.4711 | 2.528  | 1.49 | 6.79       | 0.79781 |
| <b>31</b> | 0.4841 | -0.5484 | 0.2734 | 1.286  | 2.5083 | 0.3  | 5.77       | 0.63479 |
| <b>32</b> | 0.3939 | -0.4235 | 0.2345 | 1.3577 | 2.4671 | 1.24 | -          | 0.77526 |
| <b>33</b> | 0.3964 | -0.4955 | 0.2268 | 1.3204 | 2.4363 | 1.03 | 7.25       | 0.77676 |
| <b>34</b> | 0.3863 | -0.4639 | 0.2208 | 1.5974 | 2.7235 | 1.25 | 10.14      | 0.80215 |
| <b>35</b> | 0.3986 | -0.4679 | 0.2231 | 1.5984 | 2.9248 | 0.73 | 6.8        | 0.78623 |
| <b>36</b> | 0.3714 | -0.3986 | 0.2167 | 1.7788 | 2.8113 | 1.47 | 7.3        | 0.83505 |
| <b>37</b> | 0.3733 | -0.4163 | 0.1799 | 1.815  | 3.01   | 1.87 | 8.54       | 0.9306  |
| <b>38</b> | 0.3671 | -0.363  | 0.2041 | 1.7056 | 3.311  | 0.7  | 6.87       | 0.87311 |
| <b>39</b> | 0.379  | -0.3298 | 0.2034 | 1.6326 | 2.9753 | 2    | -          | 0.83348 |
| <b>40</b> | 0.3714 | -0.3714 | 0.226  | 1.5981 | 2.758  | 1.59 | 6.66       | 0.82133 |
| <b>41</b> | 0.363  | -0.4228 | 0.2116 | 1.8635 | 3.0201 | 0.87 | 6.43       | 0.85085 |
| <b>42</b> | 0.3747 | -0.4245 | 0.2137 | 1.5646 | 2.7289 | 1.49 | 4.5        | 0.83401 |



|           |        |         |        |        |        |      |      |         |
|-----------|--------|---------|--------|--------|--------|------|------|---------|
| <b>43</b> | 0.3702 | -0.3494 | 0.2322 | 1.6068 | 3.1634 | 1.07 | 7.44 | 0.8155  |
| <b>44</b> | 0.3718 | -0.362  | 0.2125 | 1.7292 | 2.9213 | 1.78 | 9.86 | 0.84926 |
| <b>45</b> | 0.3662 | -0.399  | 0.2176 | 1.7044 | 2.7489 | 1.64 | 9.98 | 0.83871 |
| <b>46</b> | 0.3847 | -0.4259 | 0.225  | 1.6506 | 2.9587 | 1.57 | 9.6  | 0.80109 |
| <b>47</b> | 0.3866 | -0.4297 | 0.2296 | 1.4118 | 2.6698 | 1.43 | 6.85 | 0.79006 |
| <b>48</b> | 0.3892 | -0.4116 | 0.2306 | 1.772  | 3.0067 | 0.9  | 6.74 | 0.78835 |
| <b>49</b> | 0.3982 | -0.4656 | 0.2322 | 1.1909 | 2.9927 | 0.88 | 9.32 | 0.76936 |
| <b>50</b> | 0.4053 | -0.4066 | 0.2336 | 1.6562 | 3.0094 | 0.95 | 9.95 | 0.76927 |
| <b>51</b> | 0.4075 | -0.4064 | 0.2316 | 1.6056 | 2.9401 | 0.89 | 7.87 | 0.77099 |
| <b>52</b> | 0.4004 | -0.3924 | 0.2301 | 1.616  | 2.5234 | 1.43 | 10.1 | 0.78188 |
| <b>53</b> | 0.3713 | -0.3982 | 0.2018 | 1.5731 | 2.8527 | 1.47 | 9.78 | 0.86944 |
| <b>54</b> | 0.3959 | -0.4741 | 0.2221 | 1.2832 | 2.5605 | 1.67 | 9.6  | 0.78978 |
| <b>55</b> | 0.3858 | -0.4263 | 0.22   | 1.6479 | 2.6611 | 1.05 | 8.3  | 0.81    |
